# Supplementary material
Source: PubMed Central journal article supplement (PMC5958361)
Supplement: Appendix.pdf [file Appendix.pdf]

## Appendix A: level of missing data within dataset

| Variable                                              | Missing values | % missing    |
|-------------------------------------------------------|----------------|--------------|
| Composite measure score                               | 58             | 0.8%         |
| Measure savings compared to 1st decile practice       | 114            | 1.5%         |
| Low value prescribing score                           | 66             | 0.9%         |
| Available Price Per Unit savings                      | 0              | 0.0%         |
| Prescribing volume within previous 6 months           | 0              | 0.0%         |
| QOF score                                             | 0              | 0.0%         |
| % of patients recommending practices                  | 40             | 0.5%         |
| IMD score                                             | 33             | 0.4%         |
| % of patients with long term health conditions        | 40             | 0.5%         |
| % of patients over 65 years                           | 37             | 0.5%         |
| Dispensing practice status                            | 0              | 0.0%         |
| <b>Practices with complete data for all variables</b> | <b>7477</b>    | <b>98.1%</b> |
