# Supplementary material
Source: PubMed Central journal article supplement (PMC5958361)
Supplement: Supplementary_Table.pdf [file Supplementary_Table.pdf]

**Supplementary table 1: Sensitivity analysis using  $\geq 6$  prescriptions (rather than  $\geq 1$ ) over 6 months as the definition of homeopathy prescribing**

|                                                      | Quartile boundaries | % of practices prescribing homeopathy | Univariable odds ratio | 95% confidence interval |     |     | Multivariable odds ratio* | 95% confidence interval |  |  |
|------------------------------------------------------|---------------------|---------------------------------------|------------------------|-------------------------|-----|-----|---------------------------|-------------------------|--|--|
| Composite measure score (lower percentile is better) | <40.3               | 0.6%                                  | Reference              |                         |     |     | Reference                 |                         |  |  |
|                                                      | 40.3 to 46.0        | 1.2%                                  | 2.1                    | 1.0                     | 4.3 | 2.0 | 1.0                       | 4.1                     |  |  |
|                                                      | 46.0 to 51.4        | 0.9%                                  | 1.6                    | 0.7                     | 3.3 | 1.4 | 0.7                       | 3.1                     |  |  |
|                                                      | >51.4               | 1.5%                                  | 2.7                    | 1.3                     | 5.3 | 2.4 | 1.2                       | 4.9                     |  |  |
| Aggregate savings from measures (£ per month)        | <£3.4k              | 0.6%                                  | Reference              |                         |     |     | Reference                 |                         |  |  |
|                                                      | £3.4k to £6.4k      | 1.1%                                  | 1.7                    | 0.8                     | 3.4 | 1.6 | 0.8                       | 3.3                     |  |  |
|                                                      | £6.4k to £11.0k     | 1.1%                                  | 1.7                    | 0.8                     | 3.4 | 1.6 | 0.7                       | 3.4                     |  |  |
|                                                      | >£11.0k             | 1.5%                                  | 2.4                    | 1.2                     | 4.6 | 2.1 | 0.9                       | 4.9                     |  |  |
| Total low-value prescribing cost                     | <£7.6k              | 0.4%                                  | Reference              |                         |     |     | Reference                 |                         |  |  |
|                                                      | £7.6k to £15.5k     | 1.1%                                  | 2.5                    | 1.1                     | 5.7 | 2.6 | 1.1                       | 5.9                     |  |  |
|                                                      | £15.5k to £27.6k    | 1.2%                                  | 2.8                    | 1.2                     | 6.2 | 2.9 | 1.2                       | 7.0                     |  |  |
|                                                      | >£27.6              | 1.6%                                  | 3.8                    | 1.7                     | 8.3 | 4.1 | 1.6                       | 10.4                    |  |  |
| Aggregate Price-Per-Unit savings                     | <£26.0k             | 0.5%                                  | Reference              |                         |     |     | Reference                 |                         |  |  |
|                                                      | £26.0k to £45.2k    | 1.0%                                  | 1.9                    | 0.9                     | 4.1 | 1.8 | 0.8                       | 4.0                     |  |  |
|                                                      | £45.2k to £71.8k    | 1.4%                                  | 2.6                    | 1.3                     | 5.5 | 2.4 | 1.1                       | 5.2                     |  |  |
|                                                      | >£71.8k             | 1.3%                                  | 2.5                    | 1.2                     | 5.3 | 2.0 | 0.8                       | 5.1                     |  |  |
| QOF score                                            | <528                | 1.2%                                  | Reference              |                         |     |     | Reference                 |                         |  |  |
|                                                      | 528 to 546          | 0.5%                                  | 0.4                    | 0.2                     | 0.8 | 0.4 | 0.2                       | 0.8                     |  |  |
|                                                      | 546 to 555          | 1.4%                                  | 1.1                    | 0.6                     | 2.0 | 1.1 | 0.6                       | 1.9                     |  |  |
|                                                      | >555                | 1.2%                                  | 1.0                    | 0.5                     | 1.7 | 0.9 | 0.5                       | 1.7                     |  |  |
| % of patients recommending practices                 | <70.1%              | 1.0%                                  | Reference              |                         |     |     | Reference                 |                         |  |  |
|                                                      | 70.1 to 79.3%       | 1.2%                                  | 1.2                    | 0.7                     | 2.2 | 1.2 | 0.7                       | 2.3                     |  |  |
|                                                      | 79.3 to 86.9%       | 1.0%                                  | 1.0                    | 0.5                     | 1.9 | 1.0 | 0.5                       | 2.0                     |  |  |
|                                                      | >86.9%              | 1.0%                                  | 1.0                    | 0.5                     | 1.9 | 1.1 | 0.6                       | 2.2                     |  |  |

\*adjusted for: Index of Multiple Deprivation (IMD), % of patients with a long term health condition, % of patients over 65, % of patients recommending practices, dispensing practice (yes or no), total items prescribed within the last six months
